# Supplementary material
Source: MDPI journal article supplement (https://www.mdpi.com/1999-4907/13/7/1149)
Supplement: s1 [file s1 › forests-1783029-supplementary.pdf]

**Table S1.** White-tailed deer (*Odocoileus virginianus* Zimmerman) harvested in the Upper Peninsula of Michigan from 2006-2015 (male and female; all seasons combined), as reported by the Michigan Department of Natural Resources (Frawley, 2006-2015). DMU, deer management unit; SD, standard deviation; SE, standard error.

| Region                     | Number<br>of<br>DMUs | <sup>1</sup> Deer<br>harvested<br>km <sup>-2</sup> | Minimu<br>m | Maximu<br>m | Median | SD   | SE  |
|----------------------------|----------------------|----------------------------------------------------|-------------|-------------|--------|------|-----|
| This study                 | 2                    | 20.6                                               | 18.2        | 22.9        | 20.6   | 3.4  | 2.4 |
| Rest of Upper<br>Peninsula | 20                   | 11.2                                               | 2.5         | 36.3        | 7.0    | 10.4 | 2.3 |

<sup>1</sup>Mean cumulative deer harvested km<sup>-2</sup> from 2006-2015.
